# Supplementary material
Source: publisher figshare collection journal article supplement (https://acs.figshare.com/ndownloader/files/3981103)

## Supporting information

# Inkjet-Printing-Based Soft-Etching Technique for High-Speed Polymer Ambipolar Integrated Circuits

*Dongyoon Khim,<sup>‡</sup> Kang-Jun Baeg,<sup>§</sup> Minji Kang,<sup>‡</sup> Seung-Hoon Lee,<sup>‡</sup> Nam-Koo Kim,<sup>‡</sup> Jihong Kim,<sup>‡</sup> Geon-Woong Lee,<sup>§</sup> Chuan Liu,<sup>†</sup> Dong-Yu Kim,<sup>\*,‡</sup> and Yong-Young Noh<sup>\*,†</sup>*

<sup>†</sup>Department of Energy and Materials Engineering, Dongguk University, 26 Pil-dong, 3 ga, Jung-gu, Seoul 100-715, Republic of Korea

<sup>‡</sup>Heeger Center for Advanced Materials, School of Materials Science and Engineering, Department of Nanobio Materials and Electronics, Gwangju Institute of Science and Technology (GIST), 261 Cheomdan-gwagiro, Buk-gu, Gwangju 500-712, Republic of Korea

<sup>§</sup>Nano Carbon Materials Research Group, Korea Electrotechnology Research Institute (KERI), 12, Bulmosan-ro 10beon-gil, Seongsan-gu, Changwon, Gyeongsangnam-do 642-120, Republic of Korea

## CORRESPONDING AUTHORS

\* E-mail: yynoh@dongguk.edu (Y.-Y. Noh)

\* E-mail: kimdy@gist.ac.kr (D.-Y. Kim)

**Figure S1.** (a) AFM image of soft-etched PS area on P(NDI2OD-T2) layer. (b) Corresponding cross-sectional image.

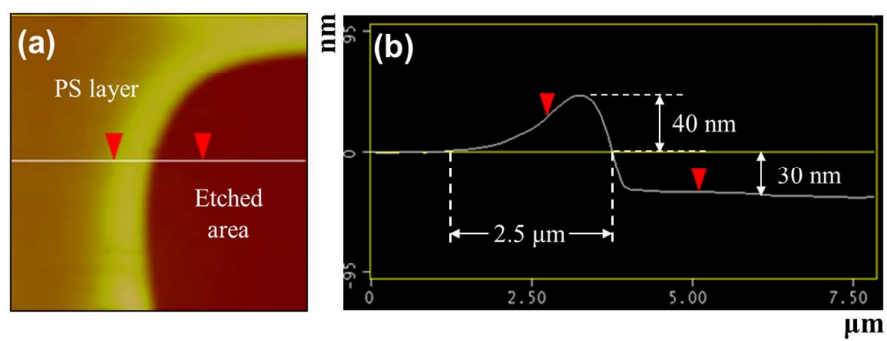

**Figure S2.** Optical microscope image of a PS soft-etched transistor array on a glass substrate.

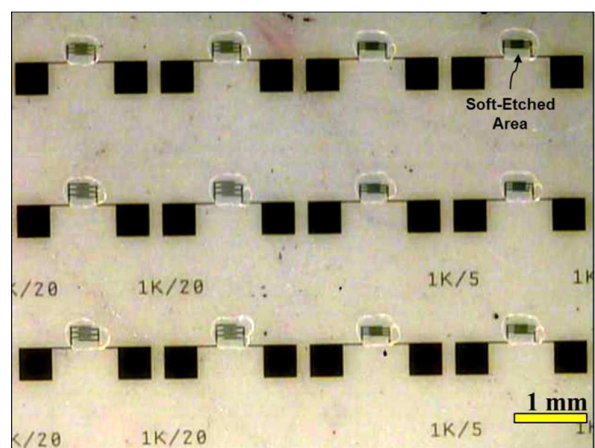

**Figure S3.** Field-effect mobility for ambipolar P(NDI2OD-T2) semiconductors with various gate dielectric layers. The values of  $\mu_{\text{FET}}$  and  $V_{\text{Th}}$  were calculated at the saturation regime ( $V_d = \pm 30$  V) using gradual channel approximation equations ( $W/L = 1.0$  mm/20  $\mu\text{m}$ ).

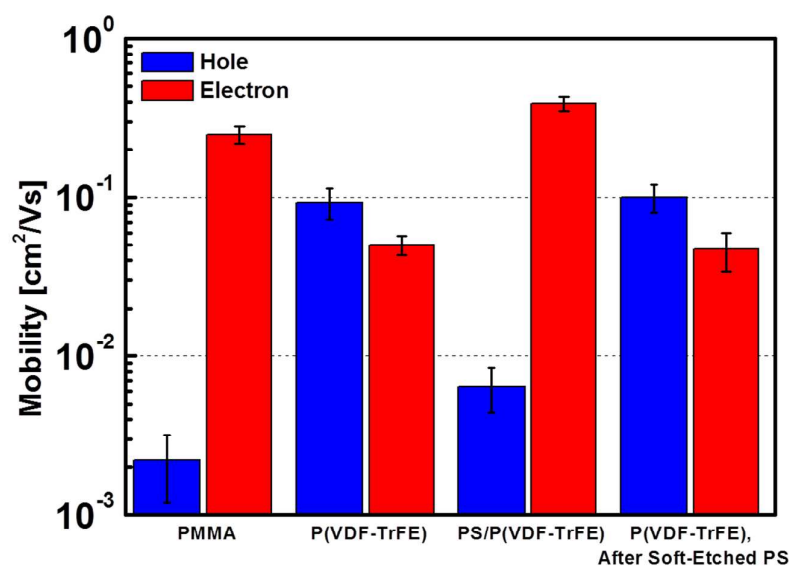

Supplement: Supplementary file 1 [file 3981103]
